# Supplementary material
Source: publisher figshare collection journal article supplement (https://acs.figshare.com/ndownloader/files/4031530)
Supplement: Supplementary file 1 [file 4031530]

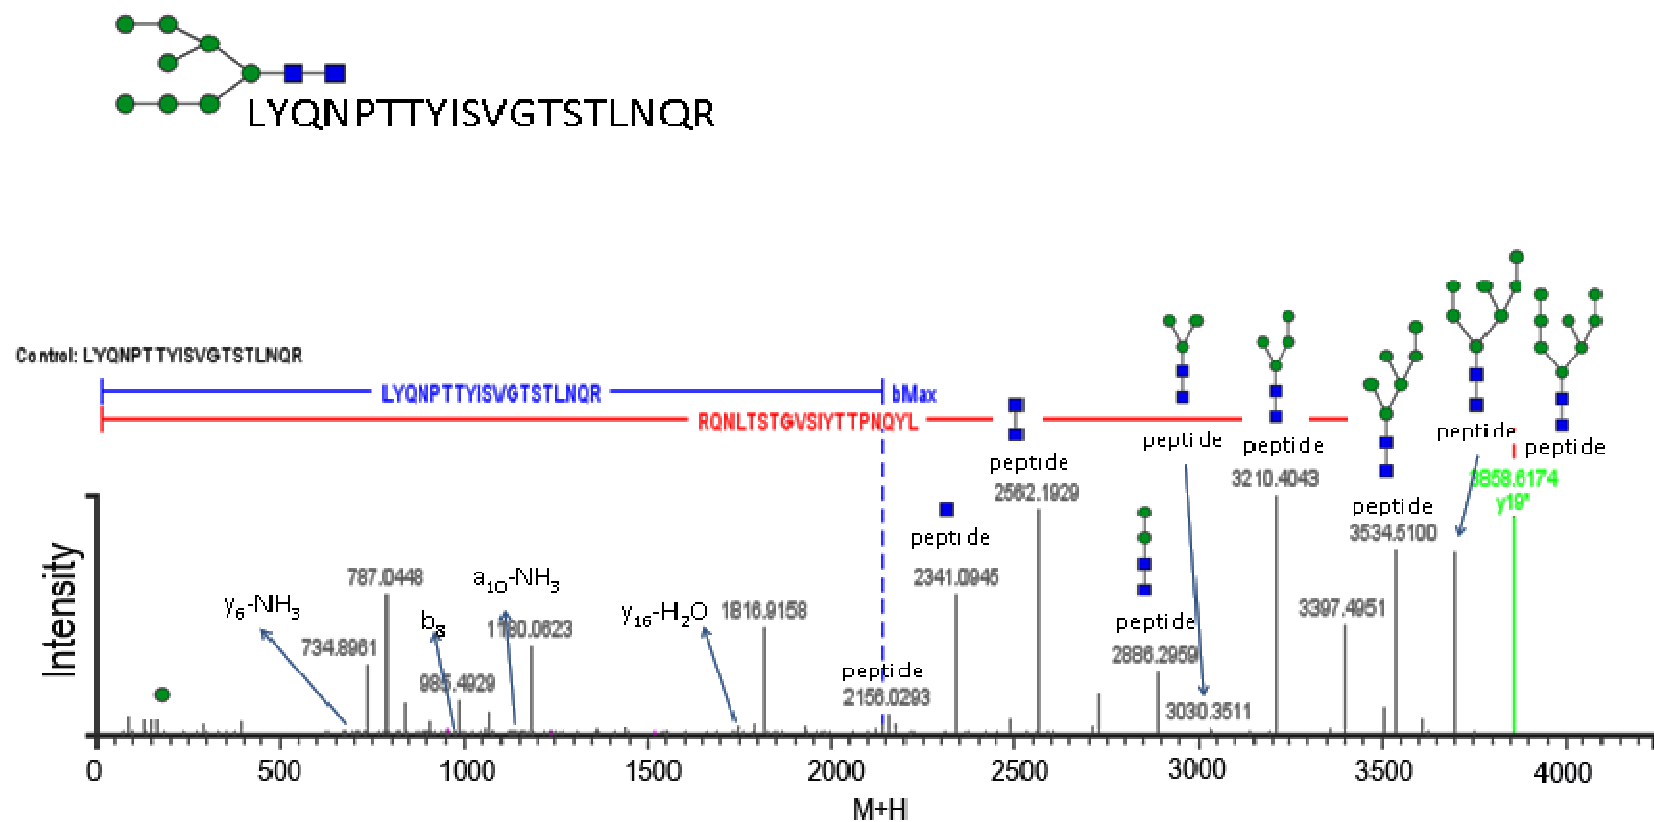

Figure S1. MS<sup>E</sup> spectrum of SWT7 derived HA glycopeptide,  $m/z$  3858.62 [M+H]<sup>+</sup> (Hex<sub>8</sub>HexNAc<sub>2</sub>)LYQNPTTYSVGTSTLNQR, containing site 4. The colors in the figure indicate the following: red-y ions; blue-b ions; green-y/b ions after neutral loss; gray-unassigned ions by the Biopharmalynx. Monosaccharide symbols: ■, N-acetylglucosamine; ●, mannose. Peptide fragments with glycosyl neutral loss are indicated.

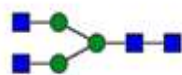

LYQNPTTYISVGTSTLNQR

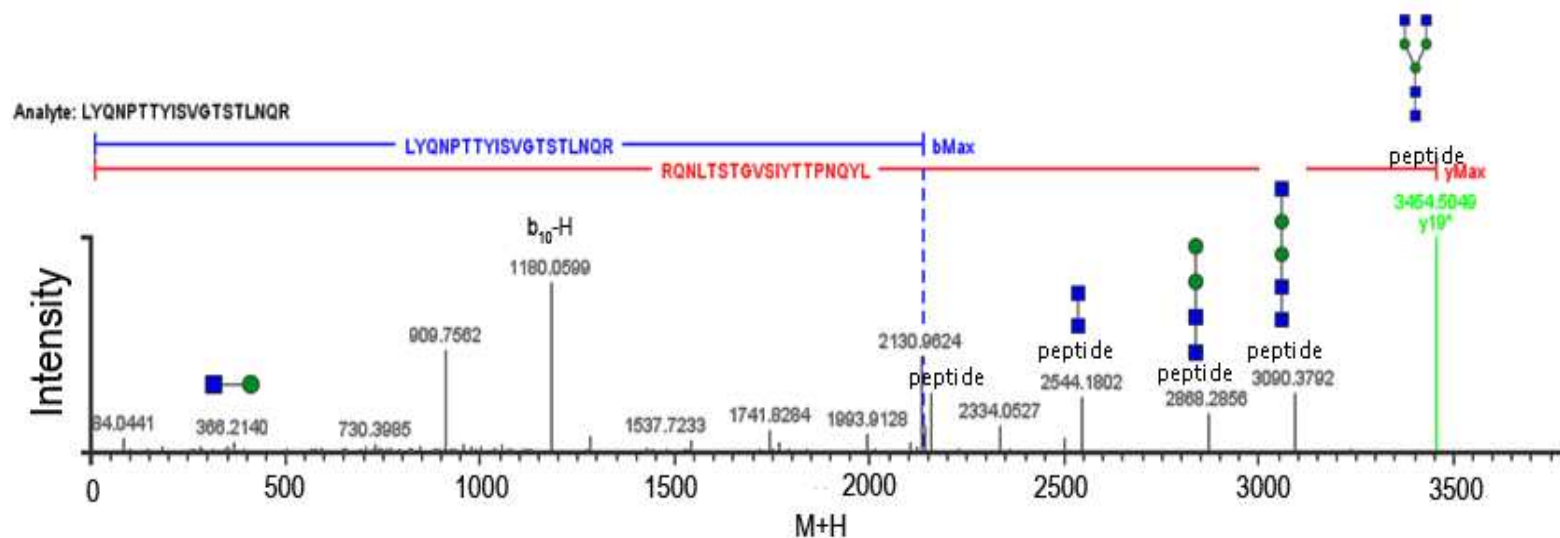

Figure S2. MS<sup>E</sup> spectrum of SWT7 derived HA glycopeptide,  $m/z$  3454.50 [M+H]<sup>+</sup> (Hex<sub>3</sub>HexNAc<sub>4</sub>)LYQNPTTYISVGTSTLNQR, containing site 4. The colors in the figure indicate the following: red, y ions; blue, b ions; green, y/b ions after neutral loss; gray-unassigned ions by the Biopharmalynx or manually assigned as indicated. Monosaccharide symbols: , N-acetylglucosamine; , mannose. Peptide fragments with glycosyl neutral loss are indicated.

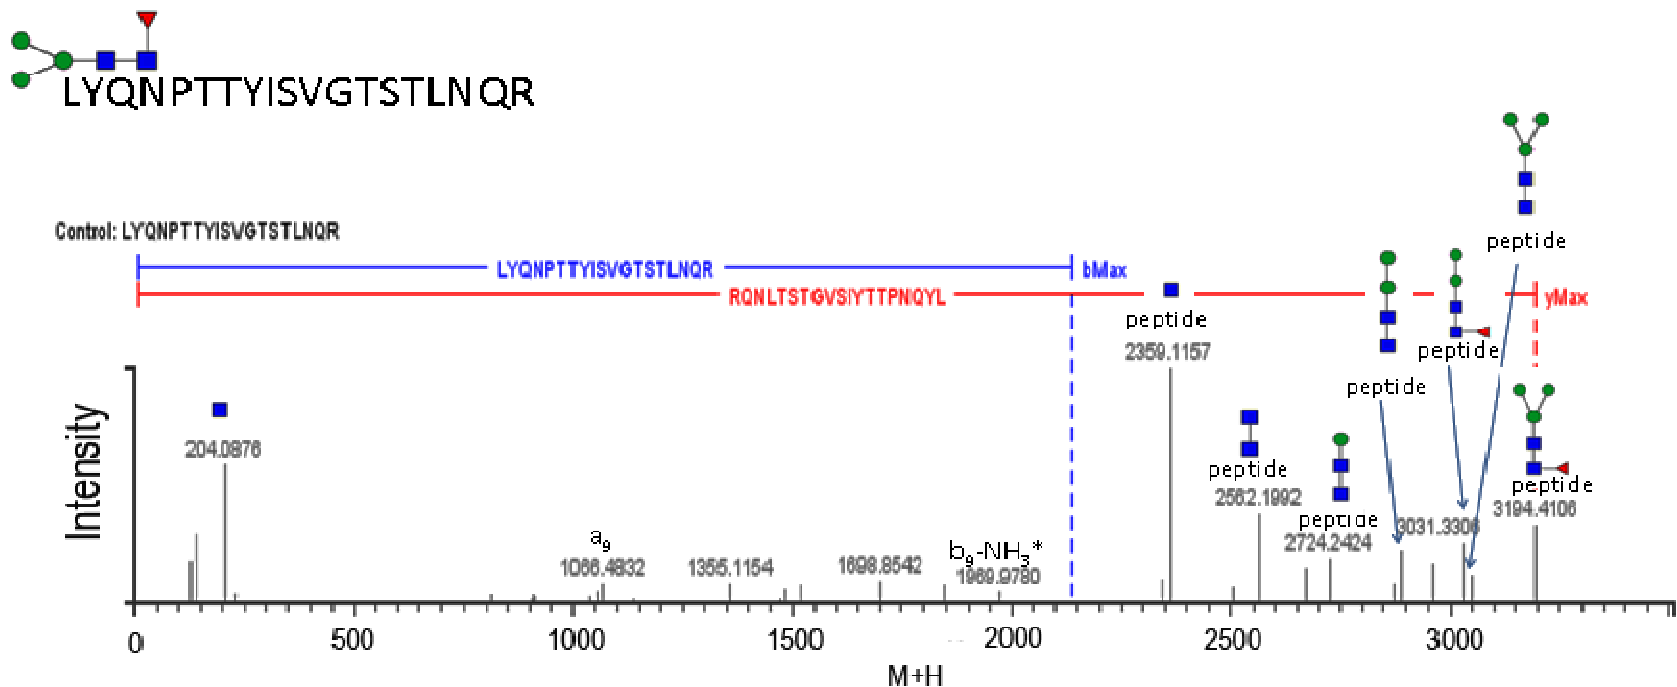

Figure S3. MS<sup>E</sup> spectrum of HighFive derived HA glycopeptide,  $m/z$  3194.41 [M+H]<sup>+</sup> (dHex<sub>1</sub>dHex<sub>3</sub>HexNAc<sub>2</sub>)LYQNPTTYISVGTSTLNQR, containing site 4. The colors in the figure indicate the following: red, y ions; blue, b ions; green, y/b ions after neutral loss; gray, unassigned ions by the Biopharmalynx or manually assigned as indicated.

Monosaccharide symbols: ■ N-acetylglucosamine; ●, mannose; ▲, fucose. Peptide fragments with glycosyl neutral loss are indicated.

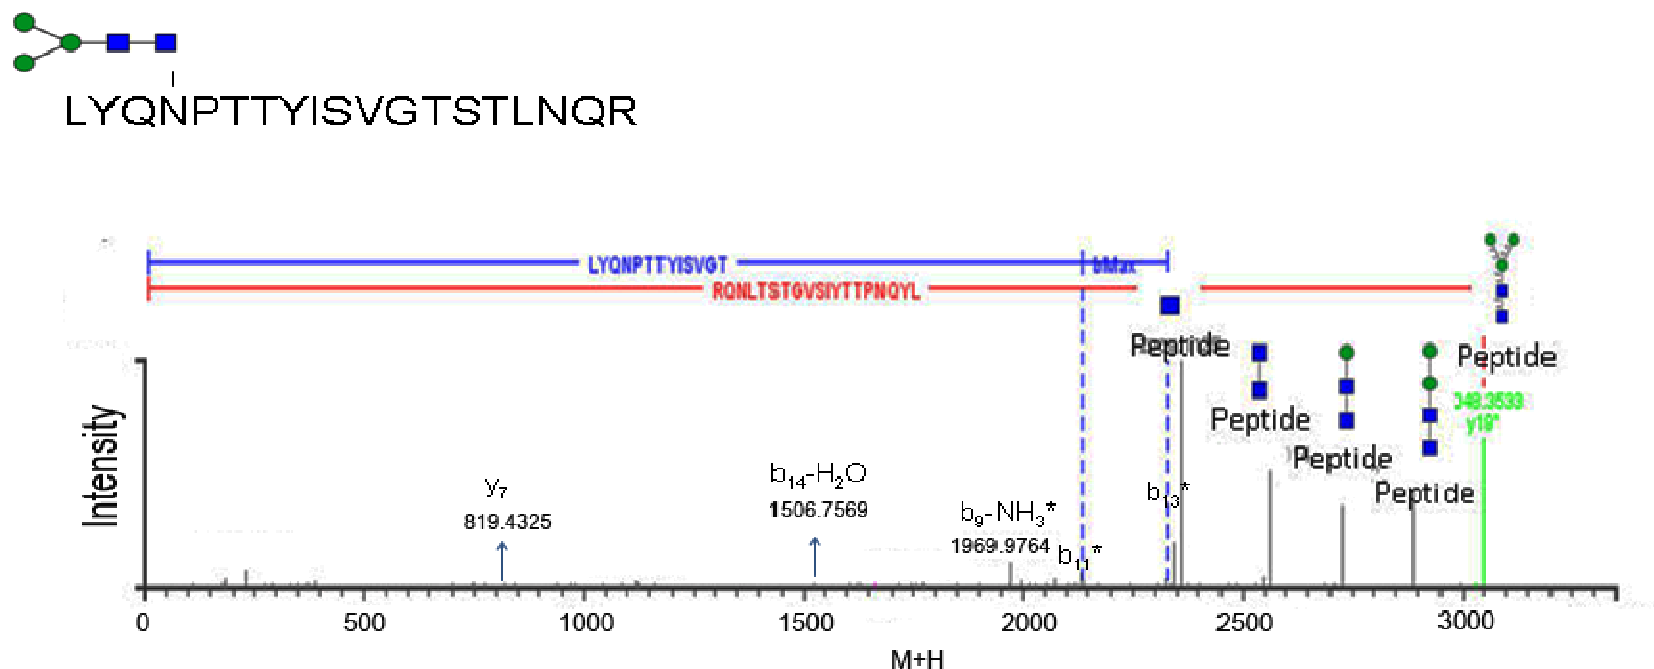

Figure S4. MS<sup>E</sup> spectrum of Sf9 derived HA glycopeptide,  $m/z$  3048.35 [M+H]<sup>+</sup> (Hex<sub>3</sub>HexNAc<sub>2</sub>)LYQNPTTYISVGTSTLNQR, containing site 4. The colors in the figure indicate the following: red, y ions; blue, b ions; green, y/b ions after neutral loss; gray, are unassigned ions by the Biopharmalynx or assigned as indicated. Monosaccharide symbols: ■, N-acetylglucosamine; ●, mannose. Peptide fragments with glycosyl neutral loss are indicated.

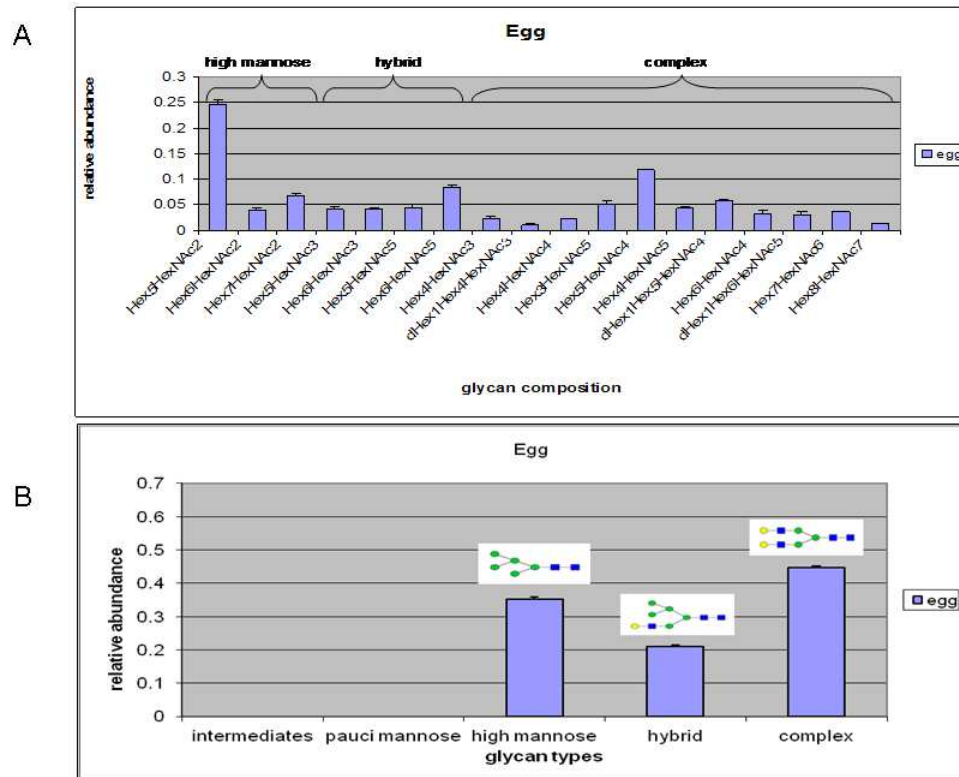

Figure S5. MALDI-TOF MS profile histogram of the egg derived HA released and permethylated glycans. Histograms are grouped by *N*-glycan subtype in A. The subtypes are summed in B for comparison. The inferred composition of the most abundant glycoforms within each sub-group is shown. The summed *N*-glycan subtypes from all cell substrates are shown as a three dimensional plot in Figure S10. The inferred composition of the most abundant glycoforms within each sub-group is shown. Measurements were performed in triplicate and error bars represent one standard deviation.

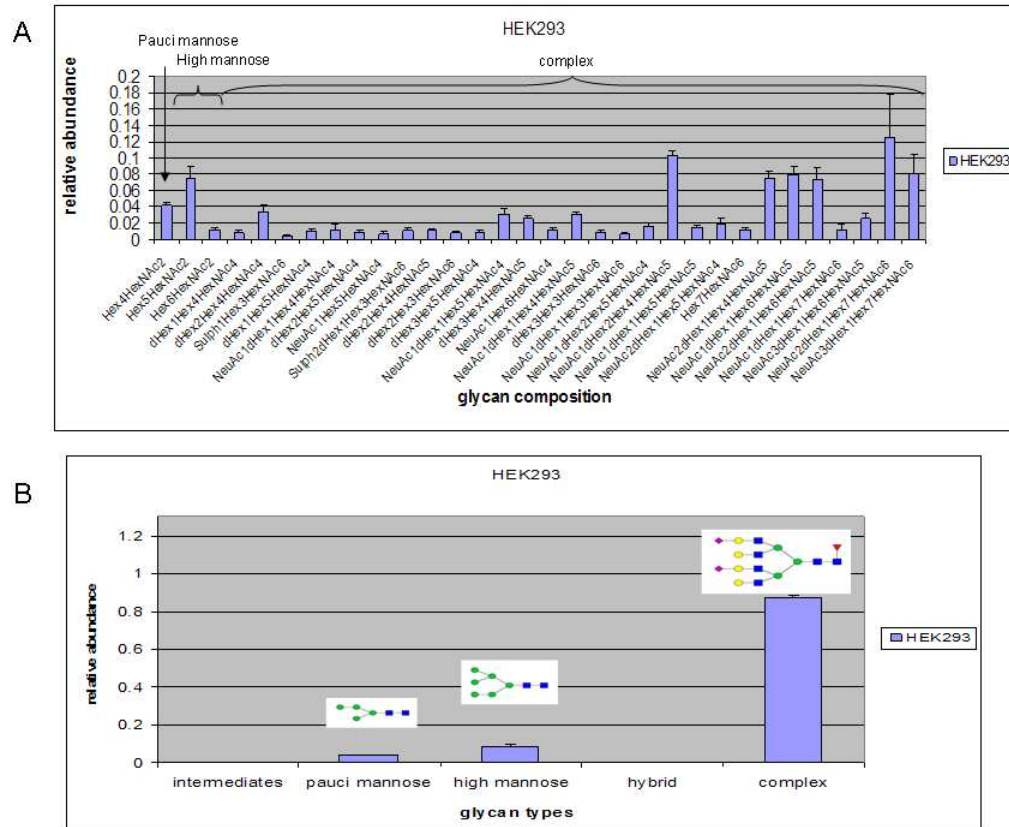

Figure S6. MALDI-TOF MS profile histogram of the HEK293 cell derived HA released and permethylated glycans. Histograms are grouped by *N*-glycan subtype in A. The subtypes are summed in B for comparison. The inferred composition of the most abundant glycoforms within each sub-group is shown. The summed *N*-glycan subtypes from all cell substrates are shown as a three dimensional plot in Figure S10. The inferred composition of the most abundant glycoforms within each sub-group is shown. Measurements were performed in triplicate and error bars represent one standard deviation.

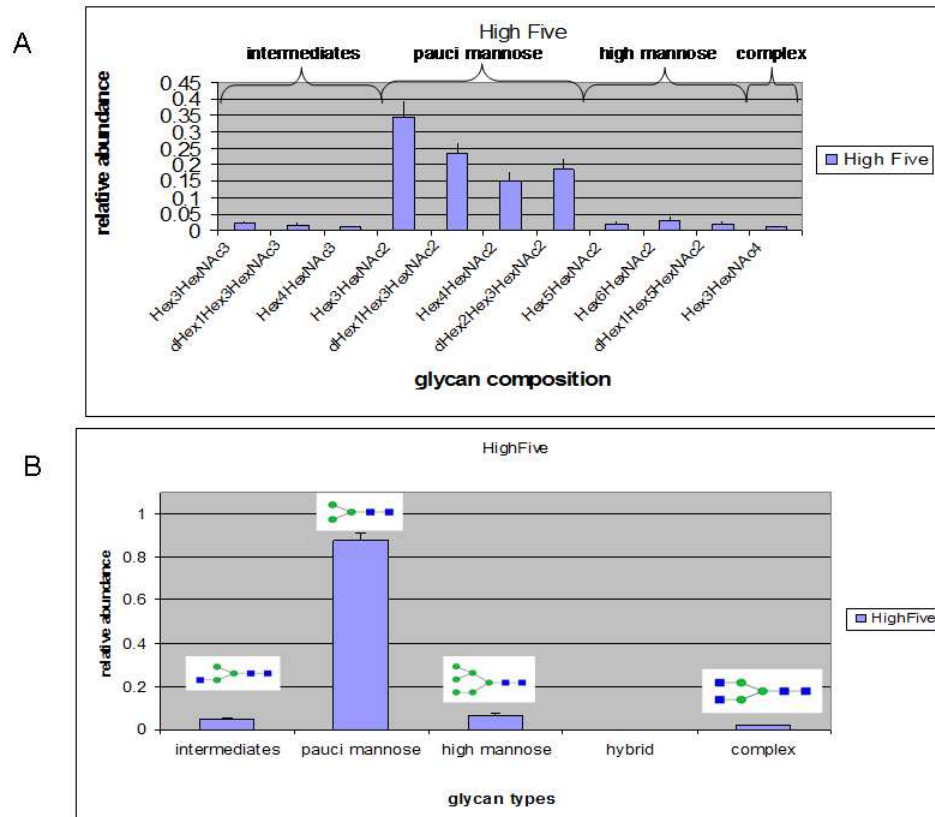

Figure S7. MALDI-TOF MS profile histogram of the HighFive cell derived HA released and permethylated glycans. Histograms are grouped by *N*-glycan subtype in A. The subtypes are summed in B for comparison. The inferred composition of the most abundant glycoforms within each sub-group is shown. The summed *N*-glycan subtypes from all cell substrates are shown as a three dimensional plot in Figure S10. Measurements were performed in triplicate and error bars represent one standard deviation.

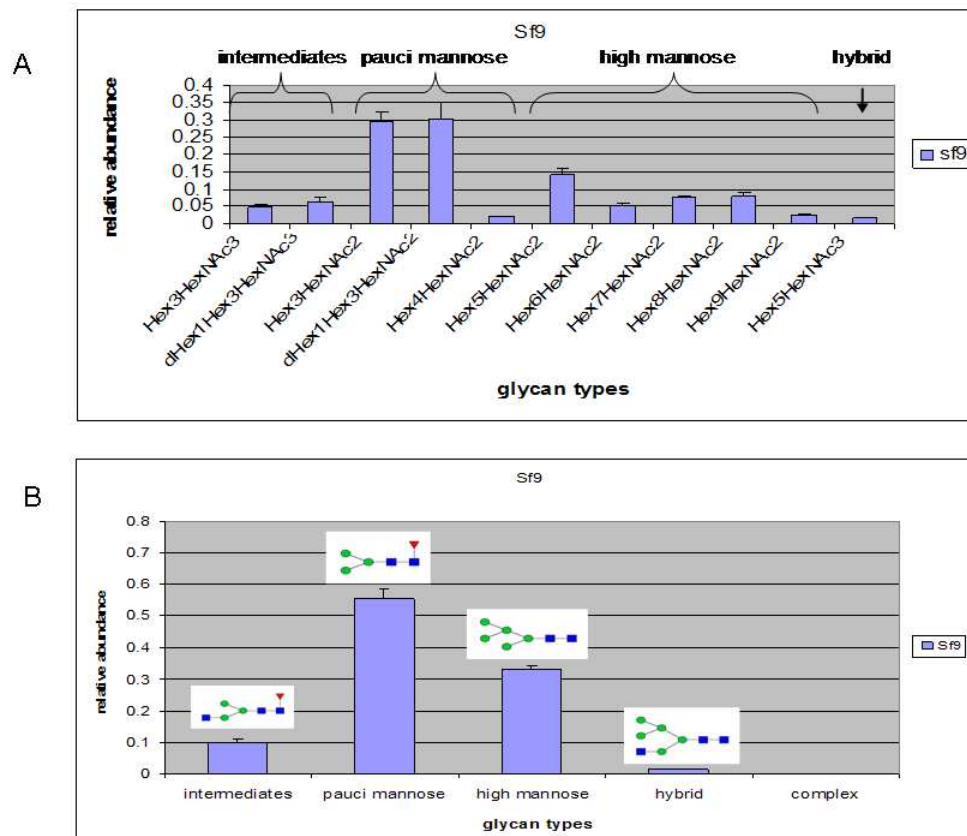

Figure S8. MALDI-TOF MS profile histogram of the Sf9 cell derived HA released and permethylated glycans. Histograms are grouped by *N*-glycan subtype in A. The subtypes are summed in B for comparison. The inferred composition of the most abundant glycoforms within each sub-group is shown. The summed *N*-glycan subtypes from all cell substrates are shown as a three dimensional plot in Figure S10. Measurements were performed in triplicate and error bars represent one standard deviation.



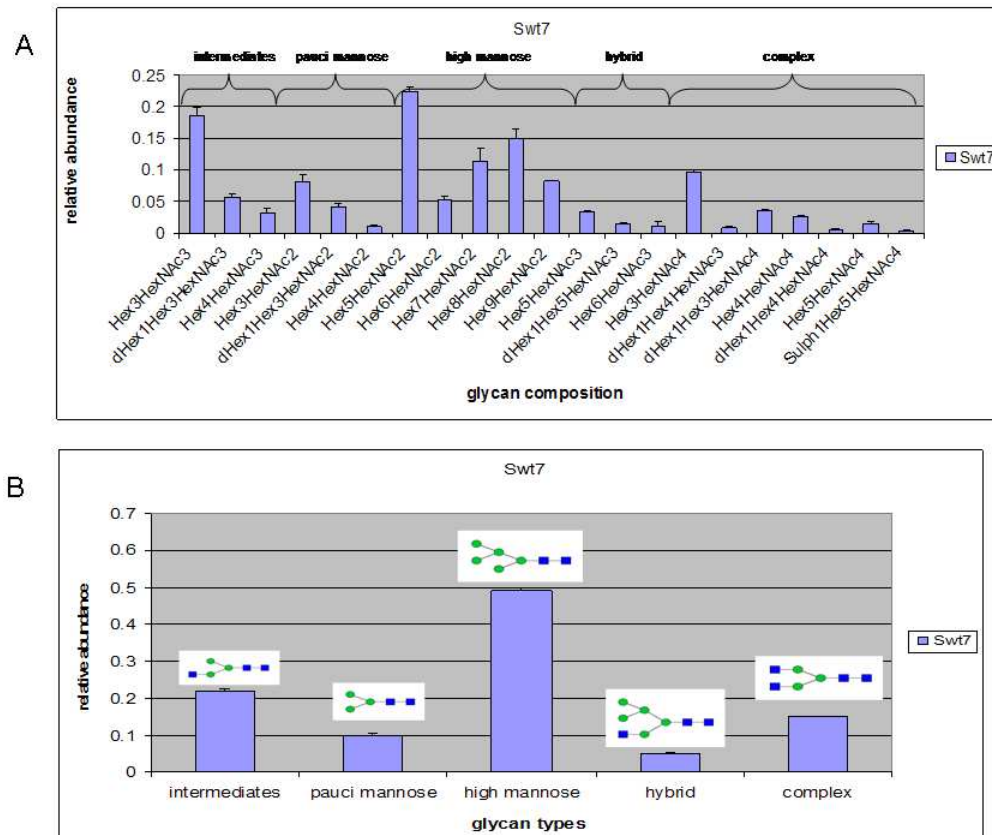

Figure S9. MALDI-TOF MS profile histogram of the SWT7 cell derived HA released and permethylated glycans. Histograms are grouped by *N*-glycan subtype in A. The subtypes are summed in B for comparison. The inferred composition of the most abundant glycoforms within each sub-group is shown. The summed *N*-glycan subtypes from all cell substrates are shown as a three dimensional plot in Figure S10. Measurements were performed in triplicate and error bars represent one standard deviation.

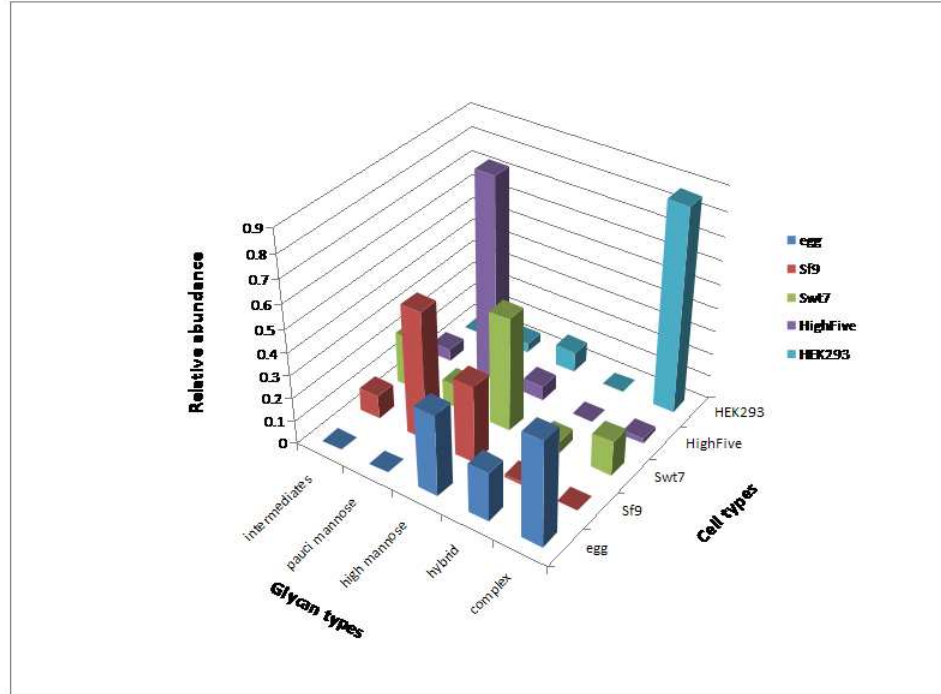

Figure S10. *N*-glycan abundances within subgroups. *N*-glycans present in intermediate, pauci mannose, high mannose, hybrid and complex subgroups are shown for HAs derived from each cell platform.
